# Supplementary material
Source: PubMed Central journal article supplement (PMC2910759)
Supplement: NIHMS213447-supplement-Supp1.pdf [file NIHMS213447-supplement-Supp1.pdf]

Supplemental Table 1. Complete Gene List, Housekeeping Genes, Gene Function, and Criteria for Study Selection

| Gene Symbol | Gene Name                                                                              | NFkappaB | Function                               | Selection Criteria               |
|-------------|----------------------------------------------------------------------------------------|----------|----------------------------------------|----------------------------------|
| 18S         | Eukaryotic ribosomal protein 18S                                                       | NO       | <i>Reference gene</i>                  | Reference gene                   |
| ACTB        | actin, beta                                                                            | NO       | <i>Reference gene</i>                  | Reference gene                   |
| ALOX5       | arachidonate 5-lipoxygenase                                                            | YES      | Inflammation                           | Prelim data: ↑Plt                |
| APCS        | amyloid P component, serum                                                             | NO       | Inflammation; athero                   | FHS                              |
| APP         | amyloid beta (A4) precursor protein (peptidase nexin-II, Alzheimer disease)            | NO       | Neurodegenerative                      | Literature (Moore)               |
| B2M         | beta-2-microglobulin                                                                   | YES      | <i>Reference gene</i>                  | Reference gene                   |
| CADM3       | cell adhesion molecule 3                                                               | NO       | adhesion                               | FHS                              |
| CCL2        | chemokine (C-C motif) ligand 2 (MCP-1)                                                 | YES      | Chemotaxis, binding                    | Prelim data: ↑Plt                |
| CCL5        | chemokine (C-C motif) ligand 5 (RANTES)                                                | YES      | Inflammation; obesity, cell migration  | Literature (Whitney)             |
| CD163       | CD163 molecule                                                                         | NO       | Inflammation; activation               | Literature (Moore)               |
| CD36        | CD36 molecule (thrombospondin receptor)                                                | NO       | Adhesion; athero, CVD                  | Literature (Moore)               |
| CD40        | CD40 molecule, TNF receptor superfamily member 5                                       | YES      | Inflammation; vascular function        | FHS                              |
| CD40LG      | CD40 ligand (TNF superfamily, member 5, hyper-IgM syndrome)                            | YES      | Inflammation; vascular function        | FHS                              |
| CD69        | CD69 molecule                                                                          | YES      | Inflammation; immunity                 | Literature (Healy)               |
| CRP         | C-reactive protein, pentraxin-related                                                  | YES      | Inflammation; CVD                      | FHS                              |
| FCER1A      | Fc fragment of IgE, high affinity I, receptor for; alpha polypeptide                   | NO       | Inflammation-IgE                       | Prelim data: ↑Plt                |
| FGFR1       | fibroblast growth factor receptor 1 (fms-related tyrosine kinase 2, Pfeiffer syndrome) | NO       | Inflammation; proliferation            | Literature (Radich)              |
| GAPDH       | glyceraldehyde-3-phosphate dehydrogenase                                               | NO       | <i>Reference gene</i>                  | Reference gene                   |
| GP1BA       | glycoprotein Ib (platelet), alpha polypeptide                                          | NO       | Platelet adhesion                      | Literature (Ma)                  |
| GSTP1       | glutathione S-transferase pi                                                           | YES      | Inflammation; proliferation            | Literature (Wettinger)           |
| ICAM1       | intercellular adhesion molecule 1 (CD54), human rhinovirus receptor                    | NO       | Inflammation; adhesion                 | FHS                              |
| IFIT1       | interferon-induced protein with tetratricopeptide repeats 1                            | NO       | Neoplasia                              | Literature(Whitney or Radich)    |
| IFNG        | interferon, gamma                                                                      | YES      | Inflammation                           | Literature(Whitney)              |
| IL1R1       | interleukin 1 receptor, type I                                                         | NO       | Inflammation; obesity, CVD             | Prelim data: ↑Leuk               |
| IL6         | interleukin 6 (interferon, beta 2)                                                     | YES      | Inflammation; obesity                  | FHS                              |
| IL6R        | interleukin 6 receptor                                                                 | NO       | Inflammation; proliferation, obesity   | Prelim data: ↑Leuk               |
| ITGA2B      | integrin, alpha 2b (platelet glycoprotein IIb of IIb/IIIa complex, antigen CD41)       | NO       | Aggregation                            | Literature (Ma)/Prelim data↑leuk |
| MIF         | macrophage migration inhibitory factor (glycosylation-inhibiting factor)               | NO       | Inflammation; proliferation            | Literature (Wettinger)           |
| MPO         | myeloperoxidase                                                                        | NO       | Inflammation; phagocytosis             | FHS                              |
| NFKB1       | nuclear factor of kappa light polypeptide gene enhancer in B-cells 1 (p105)            | YES      | Inflammation; athero, sepsis           | Literature (Wettinger)           |
| OR10J1      | olfactory receptor, family 10, subfamily J, member 1                                   | YES      | Fertilization; regulates Traf6         | Prelim data                      |
| P2RY12      | purinergic receptor P2Y, G-protein coupled, 12                                         | NO       | Platelet activation; CVD               | Prelim data: ↑Leuk               |
| PF4         | platelet factor 4 (chemokine (C-X-C motif) ligand 4)                                   | NO       | Inflammation; infection, activation    | Literature (Ma)                  |
| PLA2G7      | phospholipase A2, group VII (platelet-activating factor acetylhydrolase, plasma)       | NO       | Inflammation; athero, CVD              | FHS                              |
| PTGER2      | prostaglandin E receptor 2 (subtype EP2), 53kDa                                        | NO       | Inflammation; neoplasia, proliferation | Prelim data: ↑Plt                |
| PTGS1       | prostaglandin-endoperoxide synthase 1 (COX1)                                           | NO       | inflammation, platelet function        | Prelim data: no change           |
| PTGS2       | prostaglandin-endoperoxide synthase 2 (COX2)                                           | YES      | inflammation,vascular function         | Prelim data: ↑Plt                |
| PTPN1       | protein tyrosine phosphatase, non-receptor type 1                                      | YES      | Neoplasia; migration                   | Literature (Wettinger)           |
| PTPRN2      | protein tyrosine phosphatase, receptor type, N polypeptide 2                           | NO       | Cellular survival                      | Literature (Radich)              |
| S100A9      | S100 calcium binding protein A9 (calgranulin B)                                        | NO       | Inflammation; immunity                 | Literature (Healy)               |
| SELENBP1    | selenium binding protein 1                                                             | NO       | Inflammation; eosinophilia             | Prelim data: ↑Plt                |
| SELP        | selectin P (granule membrane protein 140kDa, antigen CD62)                             | YES      |                                        | Prelim data: no change           |
| SERPINB9    | serpin peptidase inhibitor, clade B (ovalbumin), member 9                              | NO       | Inflammation; cell death, oncology     | Prelim data: ↑Plt                |
| TLR2        | toll-like receptor 2                                                                   | YES      | immunity-thrombosis                    | Prelim data-plt                  |
| TLR4        | toll-like receptor 4                                                                   | NO       | immunity-athero                        | Prelim data-leuk                 |
| TNF         | tumor necrosis factor (TNF superfamily, member 2)                                      | ? NO     | Inflammation                           | FHS                              |
| TNFRSF11B   | tumor necrosis factor receptor superfamily, member 11b (osteoprotegerin)               | NO       | Inflammation; differentiation          | FHS                              |
| TNFRSF1B    | tumor necrosis factor receptor superfamily, member 1B                                  | YES      | Inflammation; differentiation          | FHS                              |

**Supplemental Table 2. Specific Gene Expression Levels in Leukocytes and Platelets.**

| Gene      | Leukocyte Expression          |         |               | Platelet Expression           |         |               | Leuk, Plt<br>Correlation, CT | P-value<br>Corr. CT | Leuk., Plt<br>Correlation Delta CT | P-value<br>Corr. Delta CT |
|-----------|-------------------------------|---------|---------------|-------------------------------|---------|---------------|------------------------------|---------------------|------------------------------------|---------------------------|
|           | Proportion<br>Expressing Gene | Mean CT | Mean Delta CT | Proportion<br>Expressing Gene | Mean CT | Mean Delta CT |                              |                     |                                    |                           |
| 18s       | 0.992                         | 4.54    | 4.12          | 0.996                         | 5.81    | 6.96          | 0.092                        | <0.0001             | 0.052                              | 0.026                     |
| ACTB      | 0.997                         | 10.31   | -1.61         | 0.99                          | 14.52   | -1.69         | 0.158                        | <0.0001             | 0.36                               | <0.0001                   |
| ALOX5     | 1                             | 11.42   | -2.7          | 0.964                         | 19.07   | -6.24         | 0.029                        | 0.21                | 0.172                              | <0.0001                   |
| APP       | 0.999                         | 12.67   | -3.95         | 0.989                         | 15.55   | -2.73         | 0.138                        | <0.0001             | 0.222                              | <0.0001                   |
| B2M       | 0.999                         | 6.41    | 2.3           | 0.995                         | 9.25    | 3.58          | 0.101                        | <0.0001             | 0.193                              | <0.0001                   |
| CCL2      | 0.883                         | 22.79   | -14.07        | 0.442                         | 28.28   | -15.46        | 0.045                        | 0.054               | 0.113                              | <0.0001                   |
| CCL5      | 0.999                         | 9.46    | -0.75         | 0.996                         | 11.56   | 1.26          | 0.15                         | <0.0001             | 0.176                              | <0.0001                   |
| CD163     | 0.999                         | 12.76   | -4.04         | 0.913                         | 21.42   | -8.6          | 0.01                         | 0.67                | 0.135                              | <0.0001                   |
| CD36      | 0.999                         | 10.9    | -2.19         | 0.989                         | 15.39   | -2.56         | 0.087                        | 0.0002              | 0.222                              | <0.0001                   |
| CD40      | 0.997                         | 15.33   | -6.61         | 0.947                         | 20.29   | -7.46         | 0.074                        | 0.0015              | 0.188                              | <0.0001                   |
| CD40LG    | 0.997                         | 14.97   | -6.25         | 0.966                         | 19.87   | -7.07         | -0.011                       | 0.63                | 0.167                              | <0.0001                   |
| CD69      | 0.995                         | 15.28   | -6.57         | 0.936                         | 21.7    | -8.87         | -0.031                       | 0.18                | 0.249                              | <0.0001                   |
| FCER1A    | 0.857                         | 24.49   | -15.77        | 0.317                         | 28.74   | -15.92        | -0.003                       | 0.9                 | 0.117                              | <0.0001                   |
| FGFR1     | 0.988                         | 17.13   | -8.41         | 0.815                         | 23.95   | -11.13        | 0.013                        | 0.58                | 0.17                               | <0.0001                   |
| GAPDH     | 0.999                         | 9.41    | -0.69         | 0.991                         | 14.71   | -1.89         | 0.056                        | 0.016               | 0.164                              | <0.0001                   |
| GP1BA     | 0.968                         | 18.77   | -10.05        | 0.957                         | 19.49   | -6.66         | 0.427                        | <0.0001             | 0.47                               | <0.0001                   |
| GSTP1     | 1                             | 11.45   | -2.73         | 0.963                         | 19.01   | -6.19         | 0.072                        | 0.0019              | 0.427                              | <0.0001                   |
| house     | 1                             | 8.72    |               | 1                             | 12.82   |               | 0.094                        |                     |                                    |                           |
| ICAM1     | 0.994                         | 16.78   | -8.06         | 0.802                         | 24.94   | -12.12        | 0.021                        | 0.37                | 0.1                                | <0.0001                   |
| IFIT1     | 0.992                         | 15.6    | -8.89         | 0.876                         | 22.63   | -9.82         | 0.058                        | 0.013               | 0.339                              | <0.0001                   |
| IFNG      | 0.946                         | 20.79   | -12.07        | 0.635                         | 26.63   | -13.81        | 0.023                        | 0.33                | 0.144                              | <0.0001                   |
| IL1R1     | 0.968                         | 19.14   | -10.42        | 0.75                          | 25.72   | -12.9         | 0.001                        | 0.96                | 0.096                              | <0.0001                   |
| IL6       | 0.762                         | 25.82   | -17.1         | 0.347                         | 28.72   | -15.89        | 0.048                        | 0.039               | 0.133                              | <0.0001                   |
| IL6R      | 1                             | 13.49   | -4.77         | 0.937                         | 20.4    | -7.58         | 0.039                        | 0.091               | 0.084                              | 0.0003                    |
| ITGA2B    | 0.998                         | 13.78   | -5.07         | 0.988                         | 14.96   | -2.13         | 0.269                        | <0.0001             | 0.326                              | <0.0001                   |
| MIF       | 0.974                         | 13.84   | -5.09         | 0.885                         | 20.58   | -7.76         | 0.132                        | <0.0001             | 0.364                              | <0.0001                   |
| MPO       | 0.991                         | 17.71   | -9            | 0.8                           | 25.04   | -12.22        | 0.053                        | 0.022               | 0.233                              | <0.0001                   |
| NFKB1     | 0.999                         | 13.67   | -4.96         | 0.955                         | 20.4    | -7.57         | 0.02                         | 0.38                | 0.178                              | <0.0001                   |
| OR10J1    | 0.87                          | 25.6    | -16.88        | 0.366                         | 28.88   | -16.05        | -0.016                       | 0.49                | 0.249                              | <0.0001                   |
| P2RY12    | 0.999                         | 14.57   | -5.86         | 0.984                         | 16.64   | -3.81         | 0.166                        | <0.0001             | 0.209                              | <0.0001                   |
| PF4       | 0.999                         | 11.82   | -3.11         | 0.993                         | 12.89   | -0.07         | 0.252                        | <0.0001             | 0.023                              | 0.31                      |
| PLA2G7    | 0.972                         | 18.31   | -9.59         | 0.709                         | 26.27   | -13.44        | -0.01                        | 0.68                | 0.175                              | <0.0001                   |
| PTGER2    | 0.999                         | 14.77   | -6.05         | 0.926                         | 21.59   | -8.77         | 0.003                        | 0.89                | 0.143                              | <0.0001                   |
| PTGS1     | 0.999                         | 13.35   | -4.63         | 0.989                         | 15      | -2.17         | 0.242                        | <0.0001             | 0.22                               | <0.0001                   |
| PTGS2     | 0.972                         | 18.82   | -10.1         | 0.64                          | 26.69   | -13.87        | 0.026                        | 0.27                | 0.128                              | <0.0001                   |
| PTPN1     | 0.999                         | 14.45   | -5.73         | 0.959                         | 20.32   | -7.49         | 0.036                        | 0.12                | 0.267                              | <0.0001                   |
| PTPRN2    | 0.884                         | 24.4    | -15.68        | 0.178                         | 29.44   | -16.61        | 0.014                        | 0.54                | -0.018                             | 0.45                      |
| S100A9    | 0.999                         | 8.08    | 0.63          | 0.992                         | 15.89   | -3.07         | 0.004                        | 0.86                | 0.141                              | <0.0001                   |
| SELENBP1  | 0.962                         | 21.51   | -12.79        | 0.947                         | 20.45   | -7.65         | 0.265                        | <0.0001             | 0.198                              | <0.0001                   |
| SELP      | 0.976                         | 15.18   | -6.46         | 0.989                         | 16.14   | -3.31         | 0.149                        | <0.0001             | 0.087                              | 0.0002                    |
| SERPINB9  | 0.998                         | 13.86   | -5.14         | 0.949                         | 19.97   | -7.14         | 0.034                        | 0.15                | 0.066                              | 0.0048                    |
| TLR2      | 0.997                         | 13.87   | -5.17         | 0.859                         | 22.78   | -9.96         | 0.03                         | 0.19                | 0.182                              | <0.0001                   |
| TLR4      | 0.998                         | 15.81   | -7.1          | 0.852                         | 23.93   | -11.11        | 0.063                        | 0.0063              | 0.157                              | <0.0001                   |
| TNF       | 0.994                         | 17.22   | -8.5          | 0.831                         | 24.09   | -11.3         | 0.084                        | 0.0003              | 0.115                              | <0.0001                   |
| TNFRSF11B | 0.871                         | 24.04   | -15.32        | 0.154                         | 29.38   | -16.55        | 0.03                         | 0.2                 | -0.056                             | 0.016                     |
| TNFRSF1B  | 1                             | 12.34   | -3.62         | 0.946                         | 20.74   | -7.92         | 0.048                        | 0.04                | 0.138                              | <0.0001                   |

## SUPPLEMENTAL TABLES

**Supplemental Table 1.** Complete Gene List, Housekeeping Genes, Gene Function, and Criteria for Study Selection

**Supplemental Table 2.** Gene Expression Levels. Expression levels with and without normalization for housekeeping genes (delta Ct values and raw values, respectively) for platelets and leukocytes.

## SUPPLEMENTAL FIGURE LEGENDS

### SUPPLEMENTAL FIGURE LEGENDS

**Supplemental Figure 1. Housekeeping Gene Expression.** Platelet (Supplemental Figure 1a) and leukocyte (Supplemental Figure 1b). RNA expression from four reference genes were measured; beta actin (*ACTB*; black), beta-2-microglobulin (*B2M*; red), and eukaryotic ribosomal protein 18S (*18S*; green) were plotted against glyceraldehyde-3-phosphate dehydrogenase (*GAPDH*).

**Supplemental Figure 2. Age and Difference in Mean Gene Expression in Isolated Circulating Cells.** Platelet (Supplemental Figure 2a) and leukocyte (Supplemental Figure 2b) The blue line (open circle) represents the difference in predicted delta CT values between 60-69 age group and youngest age group. The red line (closed circle) is the difference in predicted delta CT values between the 70+ age group and youngest age group. Delta CT is gene-specific CT – housekeeping CT.

**Supplemental Figure 3. Sex and Difference in Mean Gene Expression in Isolated Circulating Cells.** Platelet (Supplemental Figure 3a) and leukocyte (Supplemental Figure 3b). The line represents difference in predicted delta CT values of male to female. Delta CT is gene-specific CT – housekeeping CT.

**Supplemental Figure 4. Waist Circumference and Difference in Mean Gene Expression in Isolated Circulating Cells.** Platelet (Supplemental Figure 4a) and leukocyte (Supplemental Figure 4b).

**Supplemental Figure 5. Coronary Disease and Difference in Mean Gene Expression in Isolated Circulating Cells.** Platelet (Figure 5a) and leukocyte (Figure 5b). The line is least squares mean of delta CT values of those with coronary disease compared to those with no coronary disease. Delta CT is gene-specific CT – housekeeping CT.

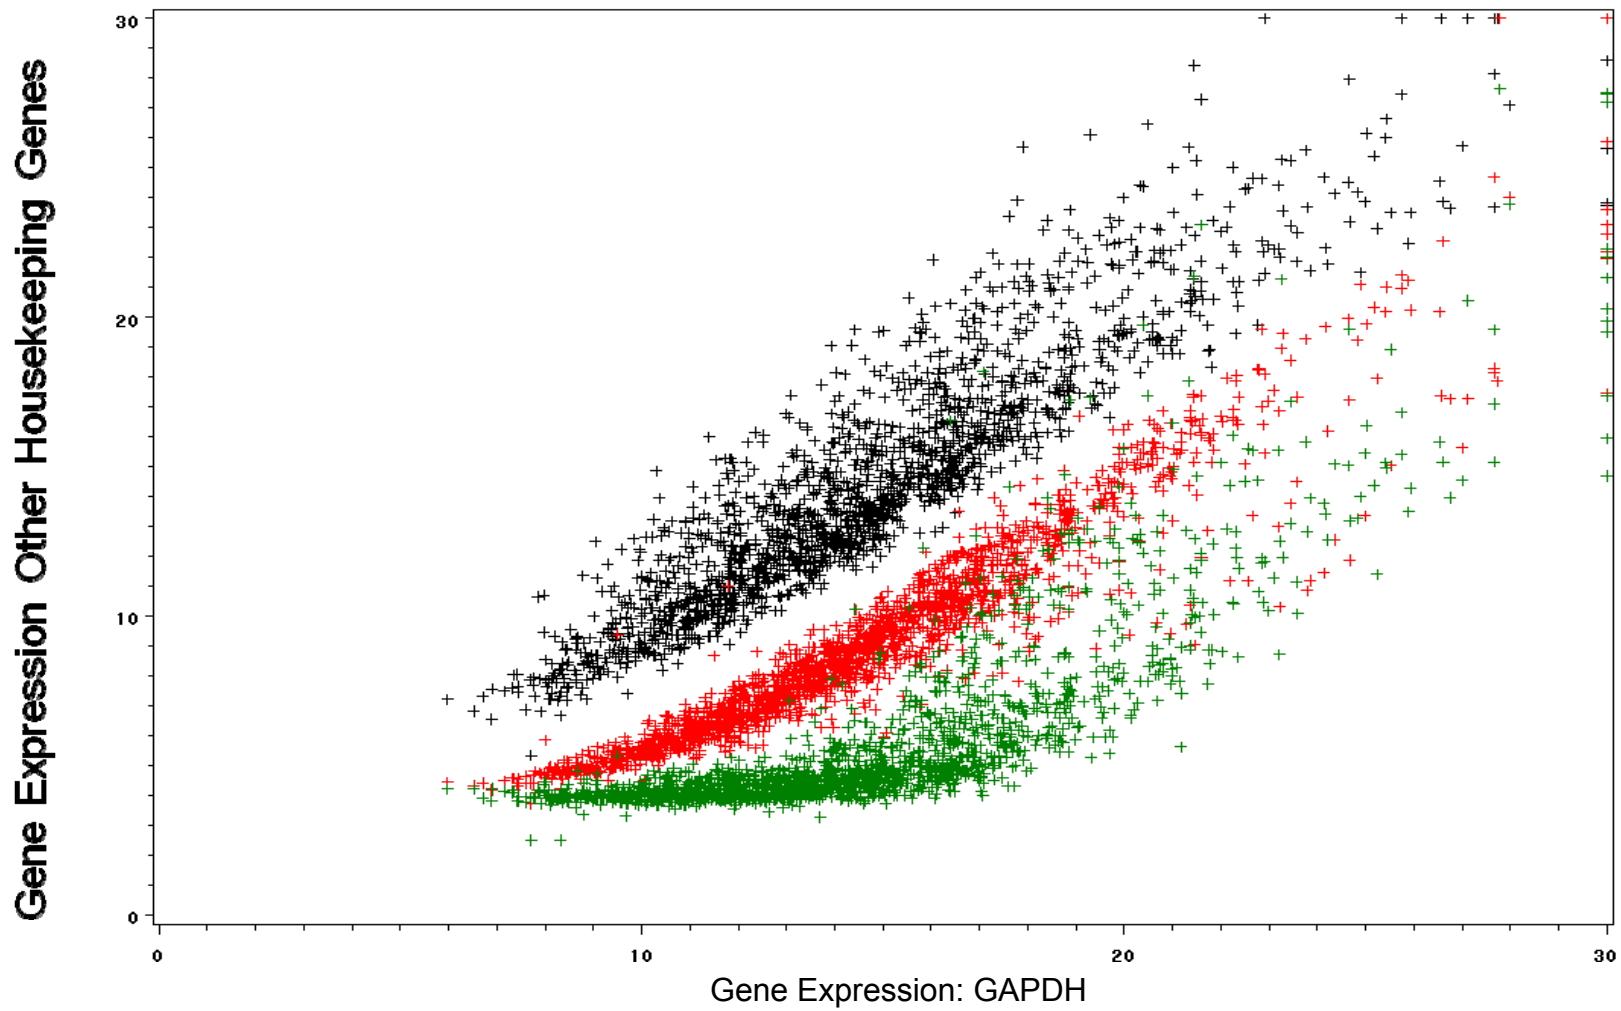

Supplemental Figure 1a: Platelet Housekeeping Gene Expression

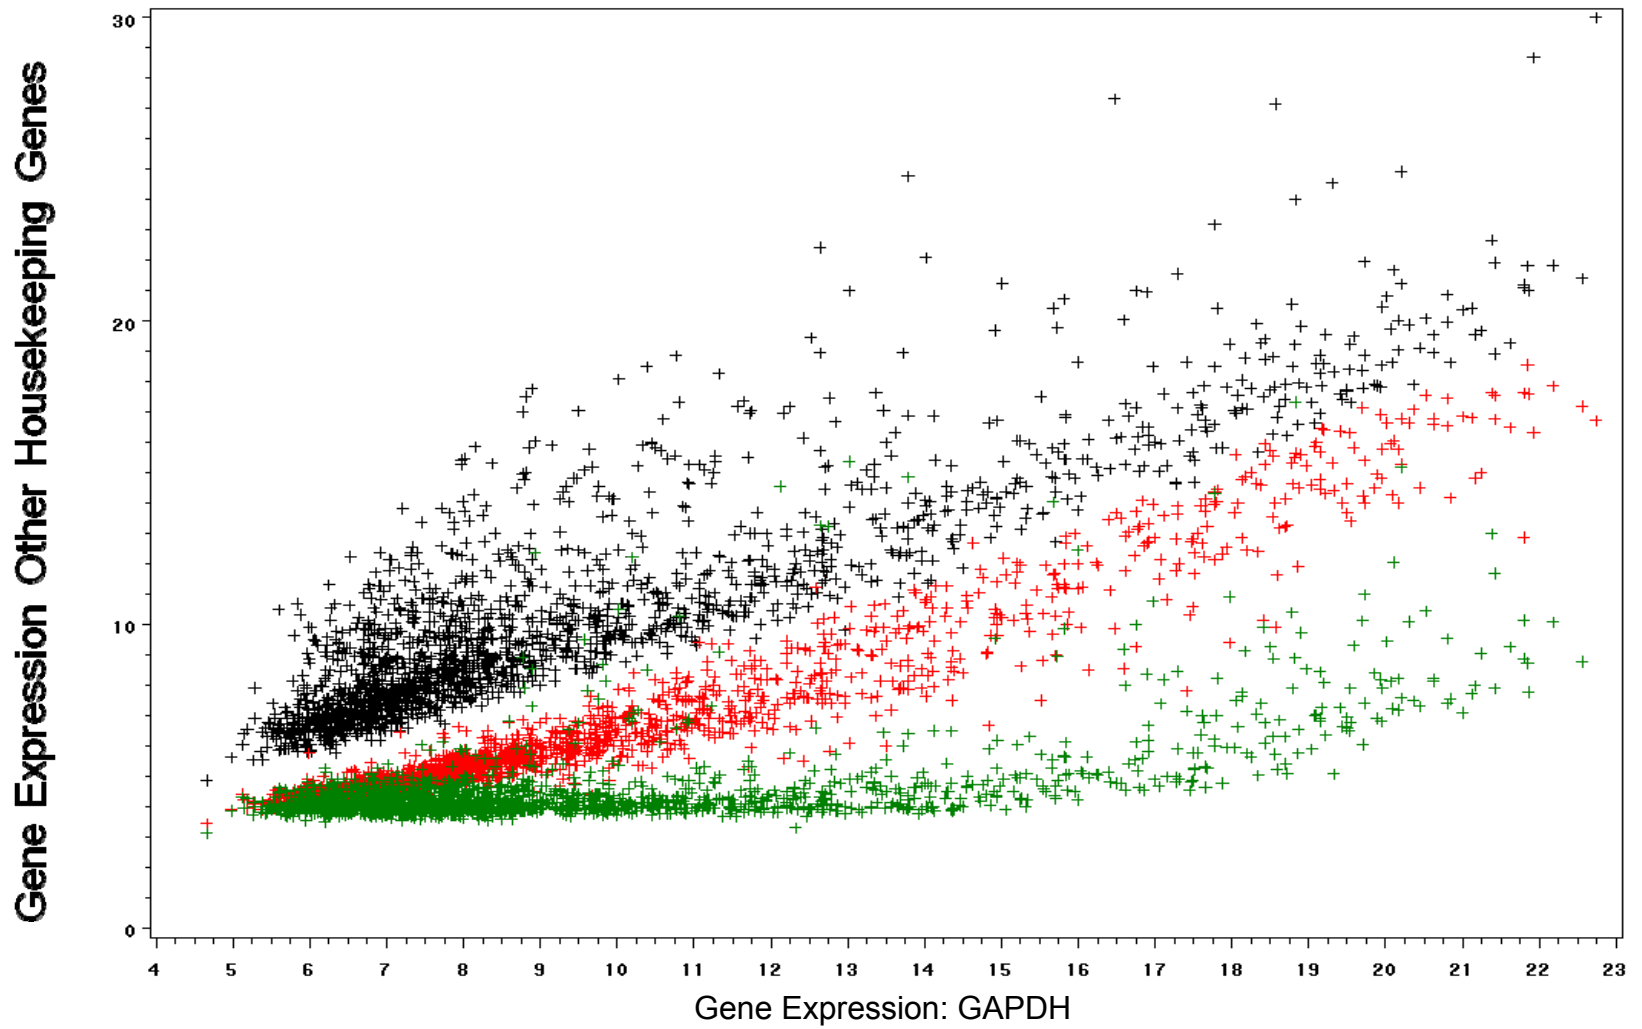

Supplemental Figure 1b: Leukocyte Housekeeping Gene Expression

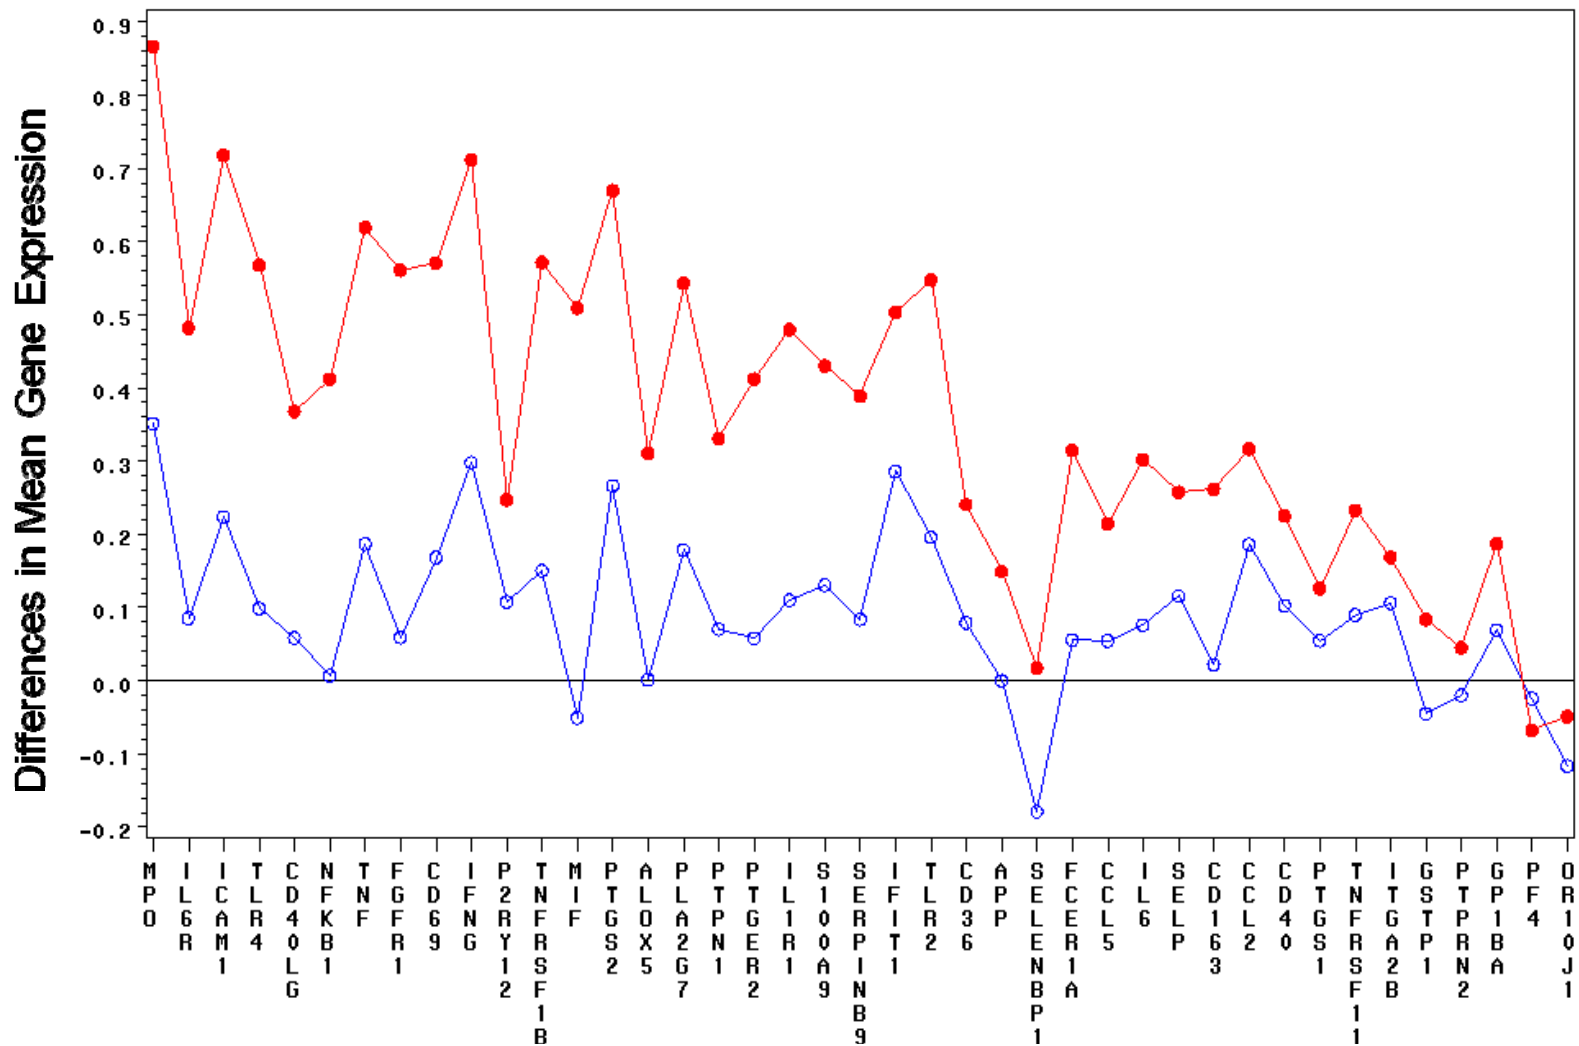

Supplemental Figure 2a: Platelets, Age, and Differences in Mean Gene Expression

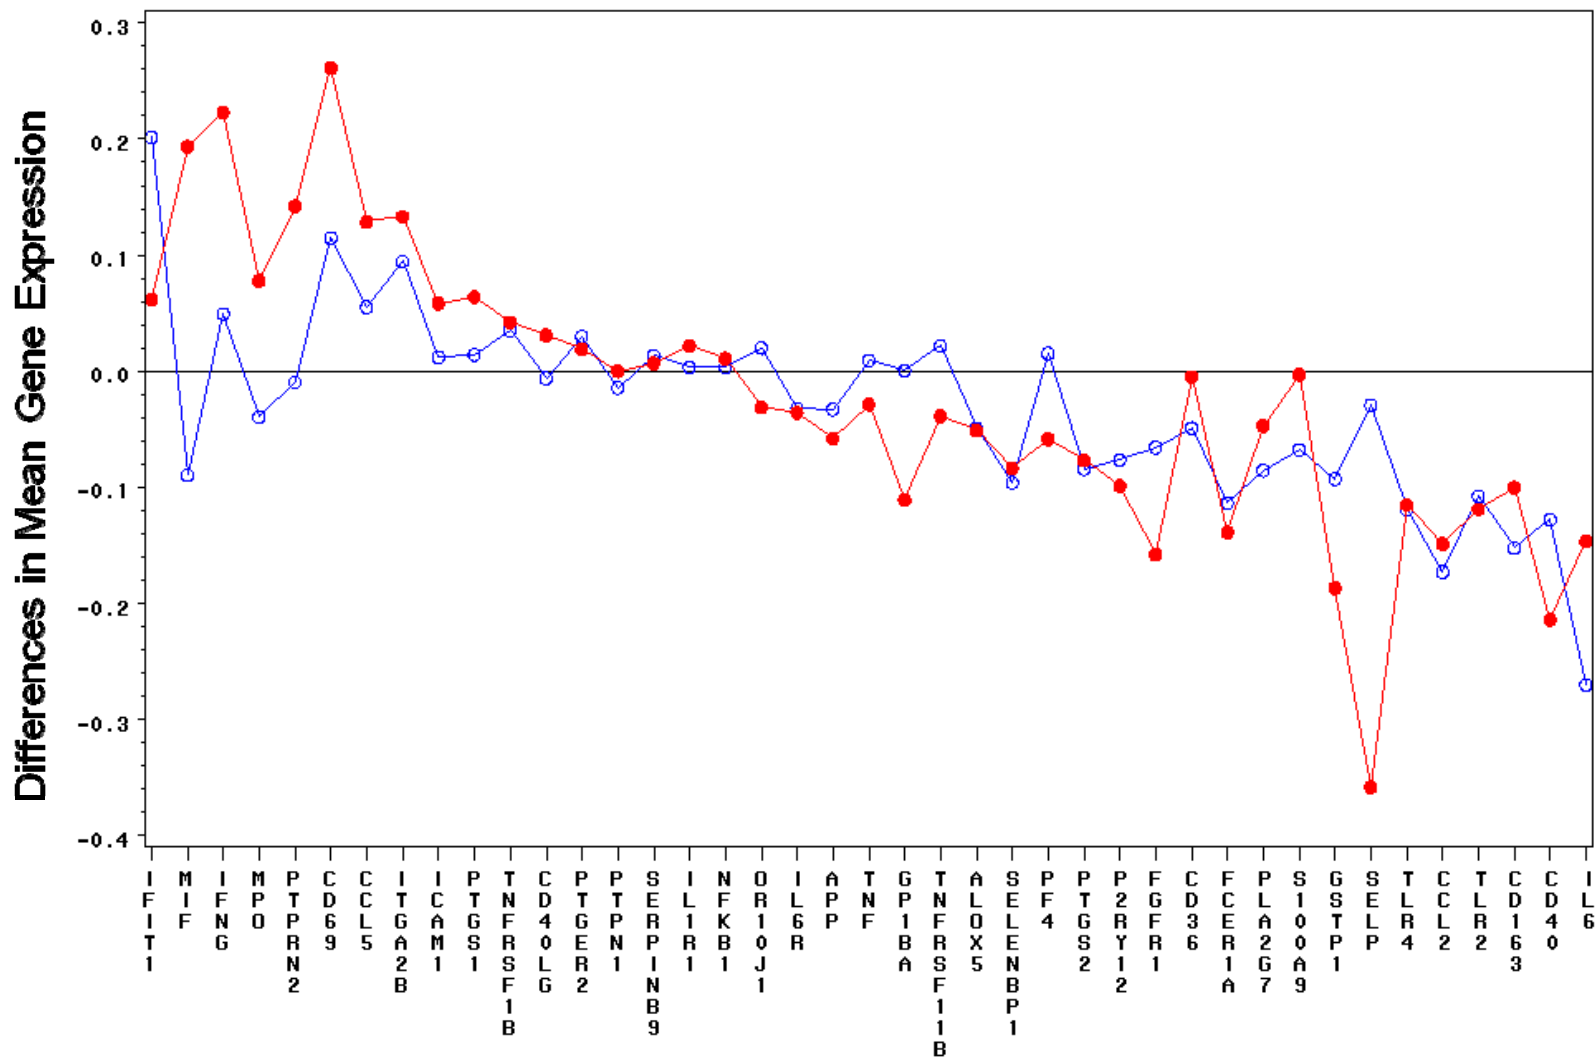

Supplemental Figure 2b: Leukocytes, Age, and Differences in Mean Gene Expression



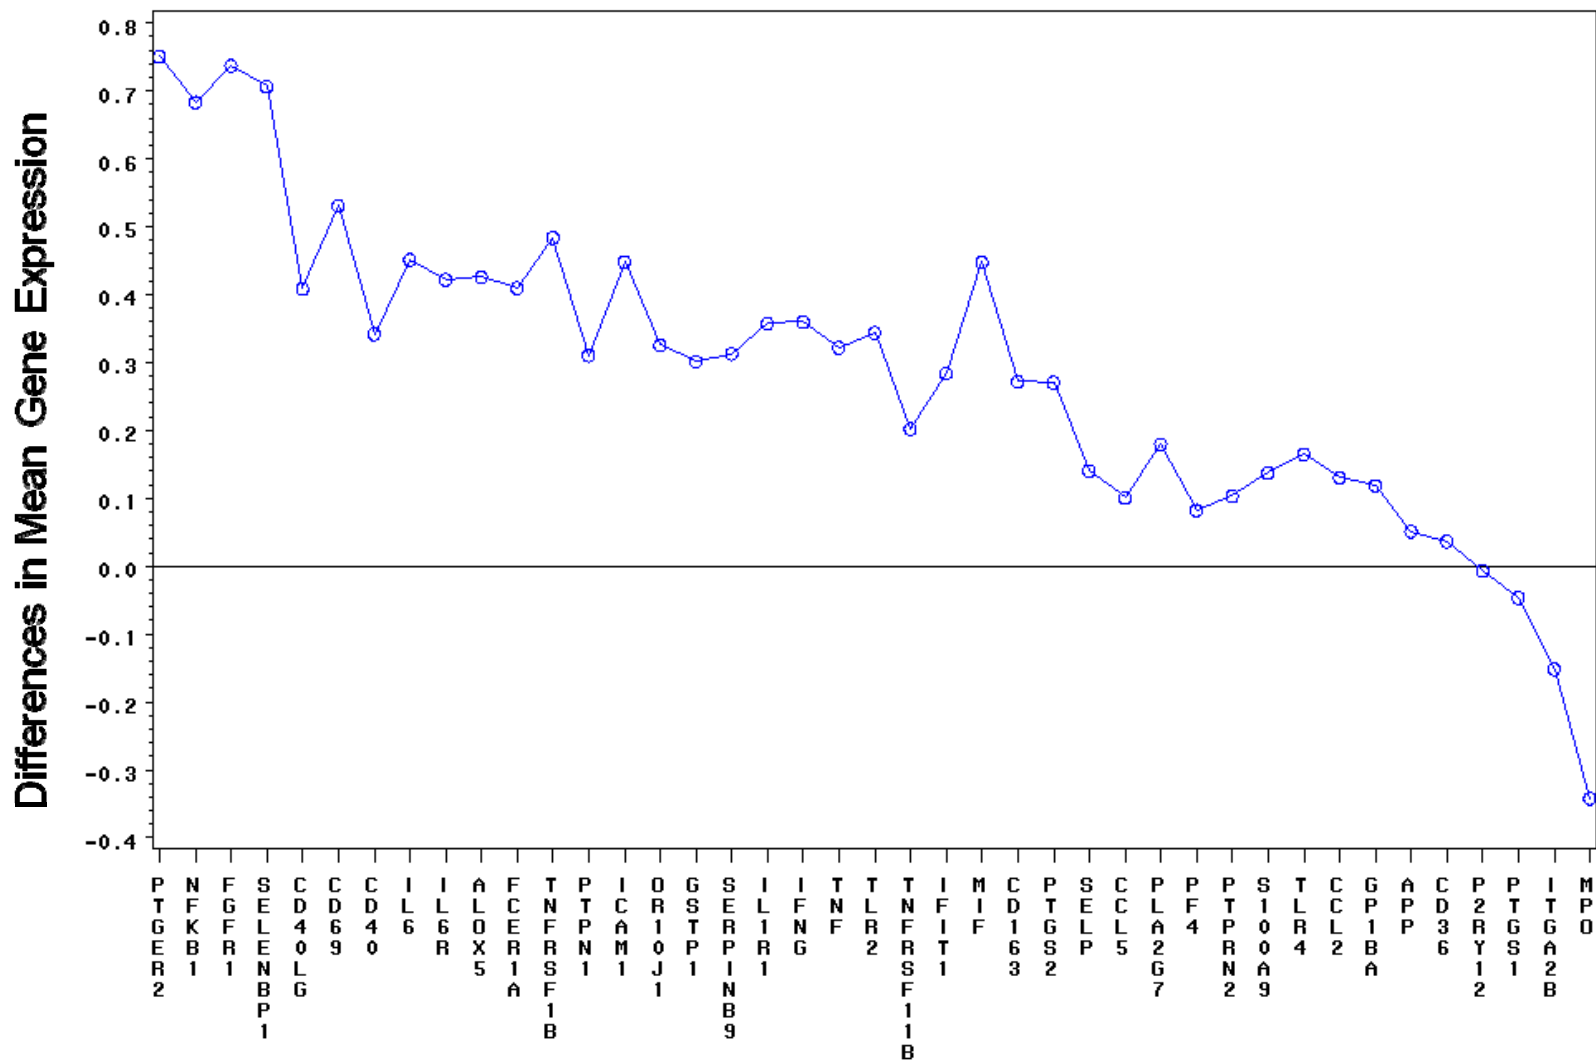

Supplemental Figure 3a: Platelets, Sex, and Differences in Mean Gene Expression

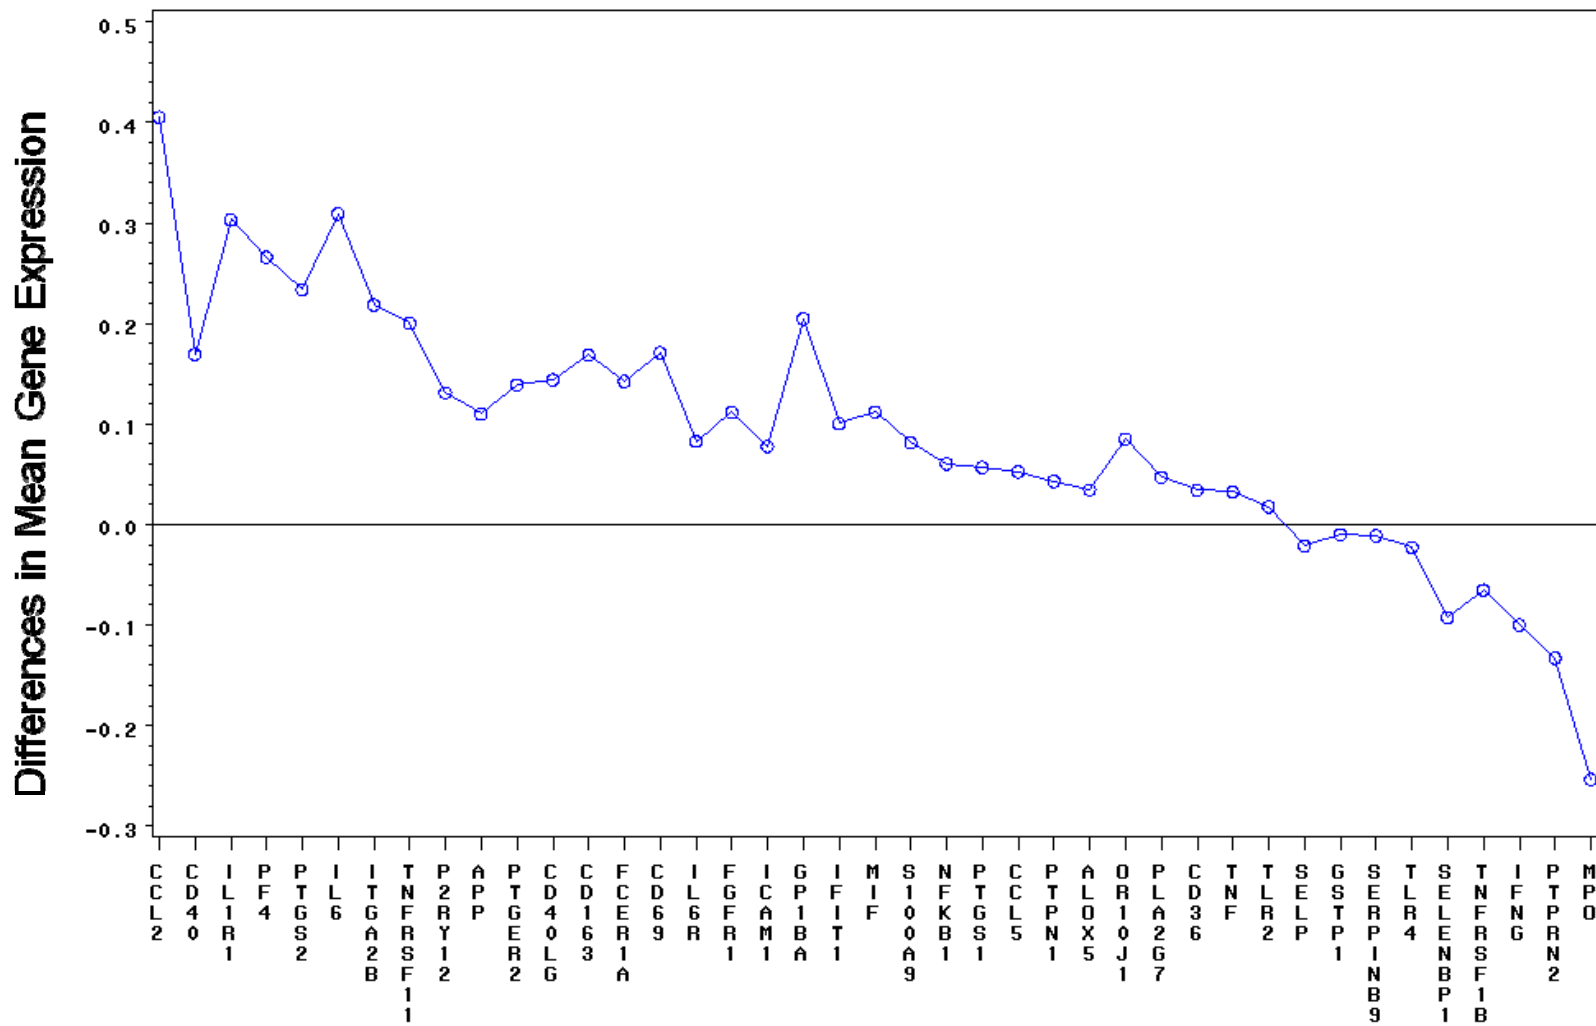

Supplemental Figure 3b: Leukocytes, Sex, and Differences in Mean Gene Expression

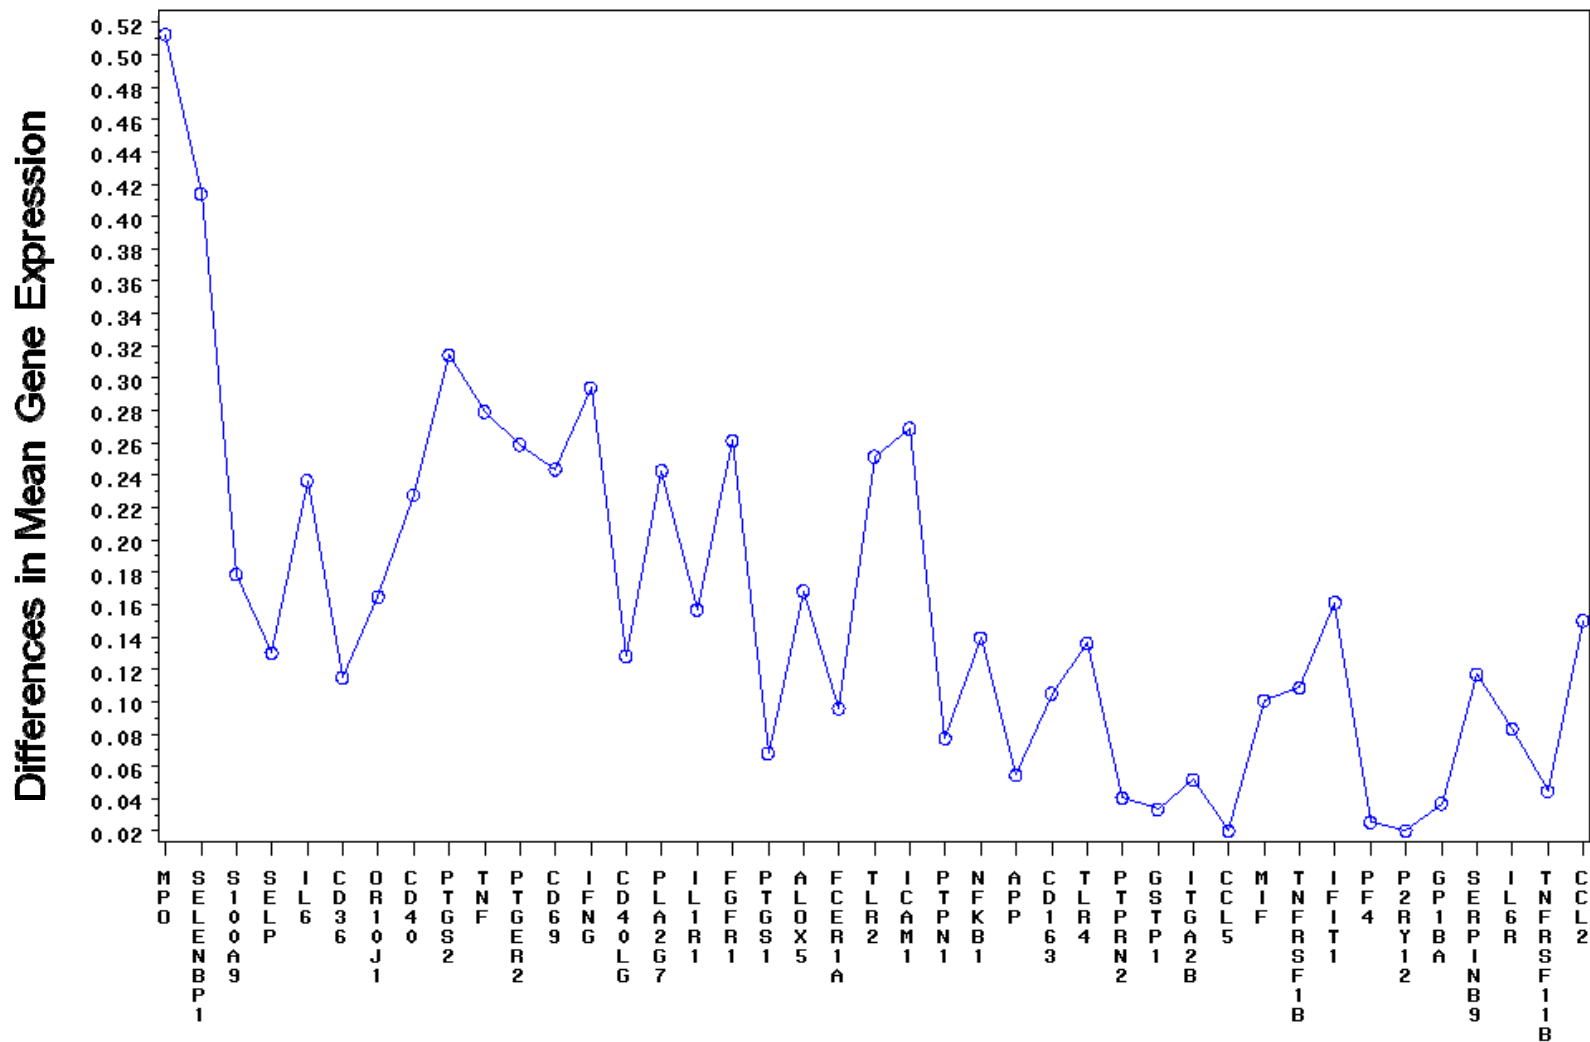

Supplemental Figure 4a: Platelets, Waist, and Differences in Mean Gene Expression



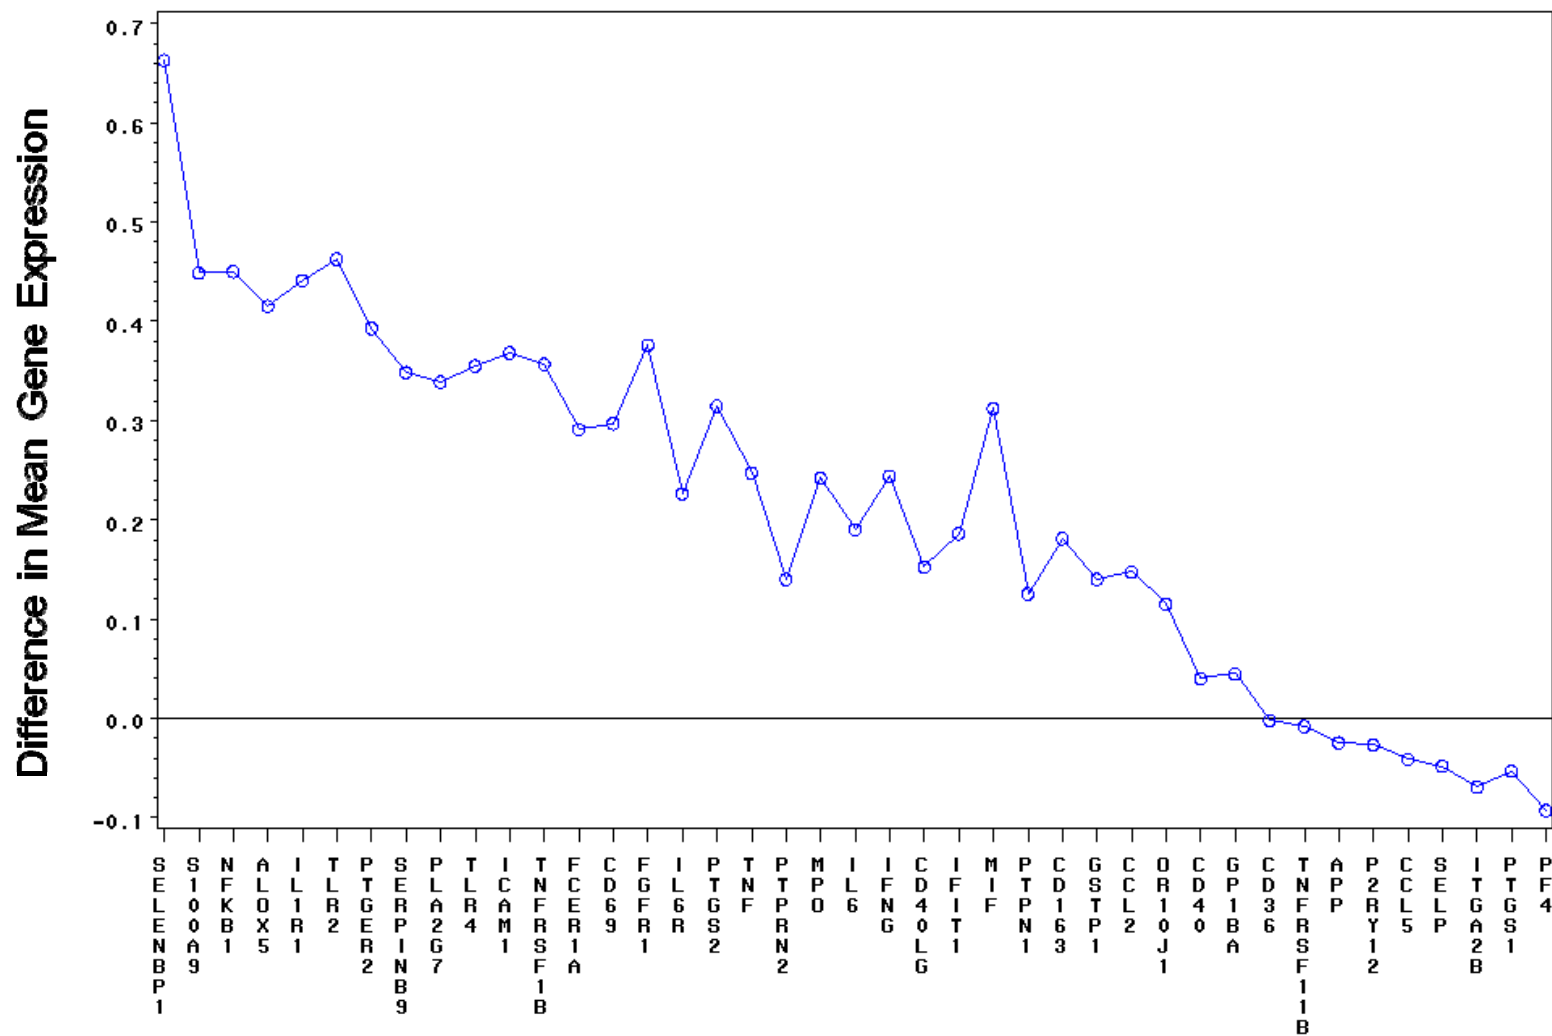

Supplemental Figure 5a: Platelets, CHD, and Difference in Mean Gene Expression

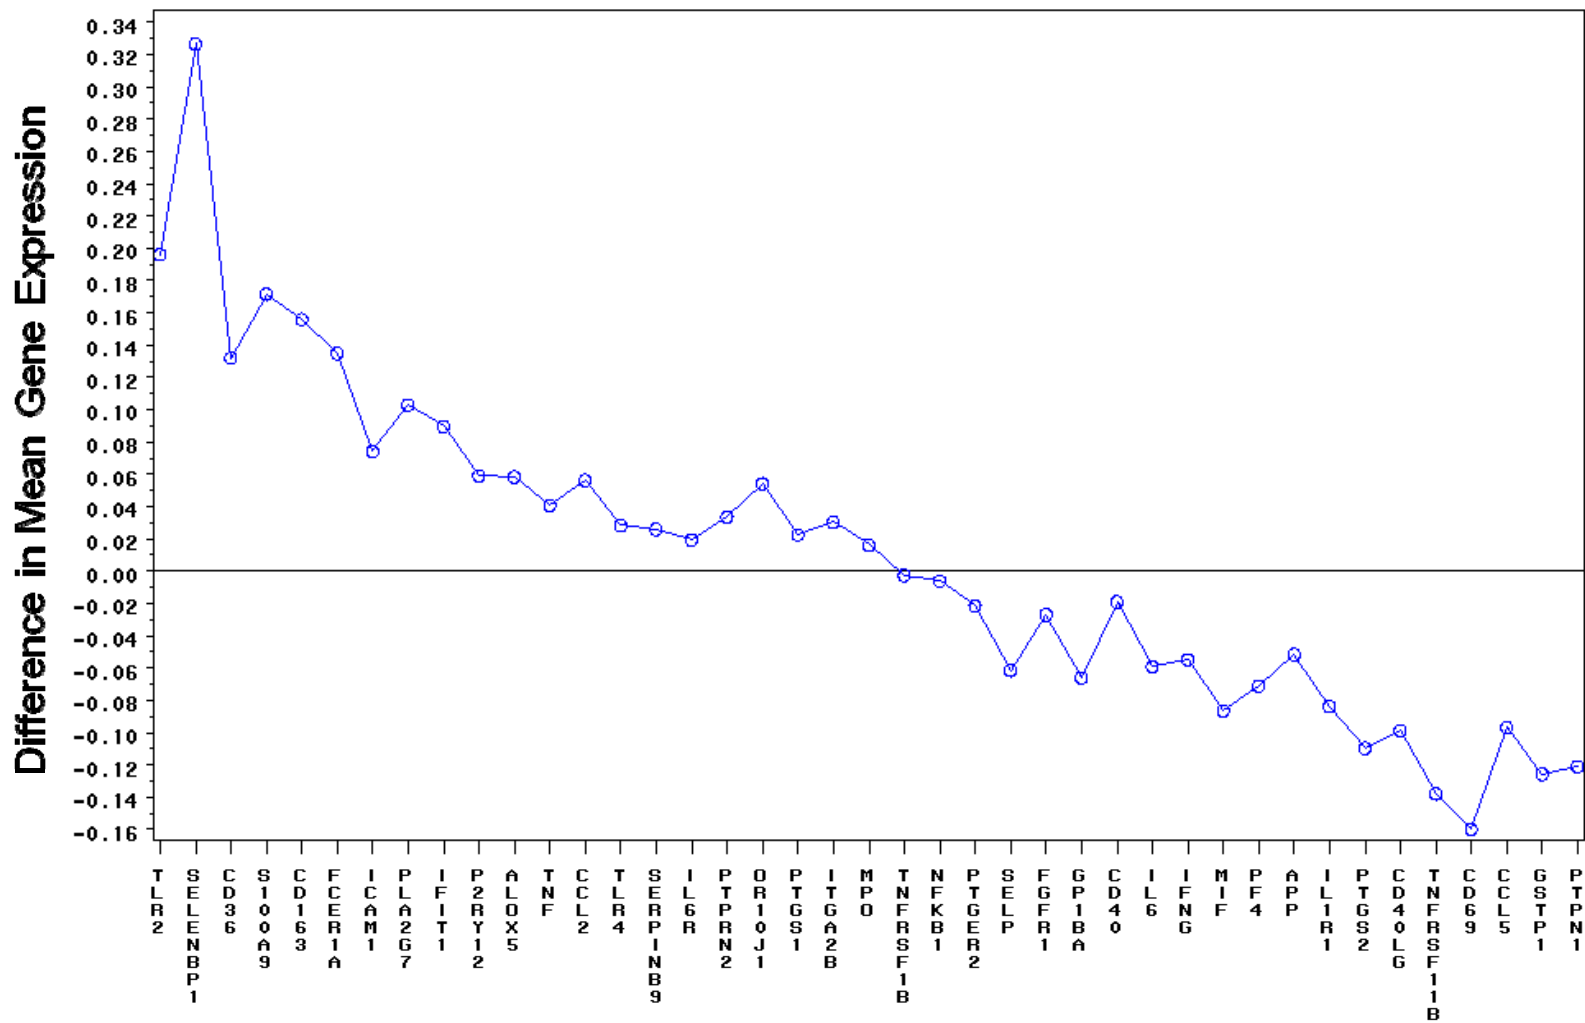

Supplemental Figure 5b: Leukocytes, CHD, and Difference in Mean Gene Expression
